# Supplementary material for: Surface and subsurface Labrador Shelf water mass conditions during the last 6000 years
Source: Copernicus journal article supplement (doi:10.5194/cp-16-1127-2020), 2020-07-03
Supplement: Supplementary file 3 [file cp-16-1127-2020-supplement.zip]

Archive with 3 entries (3 files):
- Supplement 1_Core photographs.pdf
- cp-16-1127-2020-supplement-title-page.pdf
- Supplement 2_Colour scan.pdf
