# Supplementary material for: Surface and subsurface Labrador Shelf water mass conditions during the last 6000 years
Source: Copernicus journal article supplement (doi:10.5194/cp-16-1127-2020), 2020-07-03
Supplement: Supplementary file 3 [file cp-16-1127-2020-supplement.zip › cp-16-1127-2020-supplement-title-page.pdf]

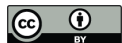

## *Supplement of*

# **Surface and subsurface Labrador Shelf water mass conditions during the last 6000 years**

**Annalena A. Lochte et al.**

*Correspondence to:* Annalena A. Lochte ([annalena.lochte@ifg.uni-kiel.de](mailto:annalena.lochte@ifg.uni-kiel.de))

- [cp-16-1127-2020-supplement-title-page.pdf](#)
- [Supplement 1\\_Core photographs.pdf](#)
- [Supplement 2\\_Colour scan.pdf](#)

The copyright of individual parts of the supplement might differ from the CC BY 4.0 License.
