# Supplementary figures and images for: Surface and subsurface Labrador Shelf water mass conditions during the last 6000 years
Source: Copernicus journal article supplement (doi:10.5194/cp-16-1127-2020), 2020-07-03

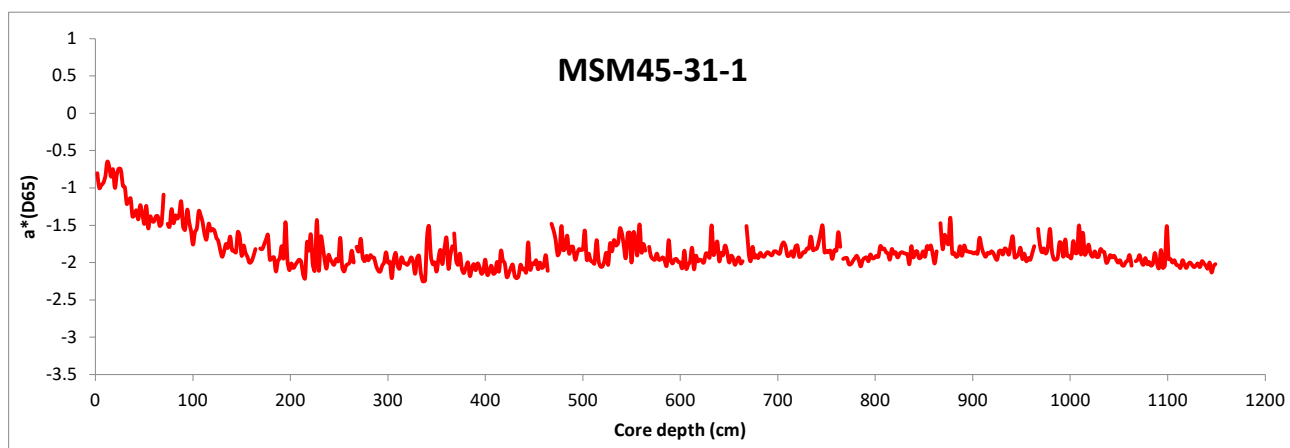

Supplement: Supplementary file 1 [file cp-16-1127-2020-supplement.zip]

# MSM45-31-1

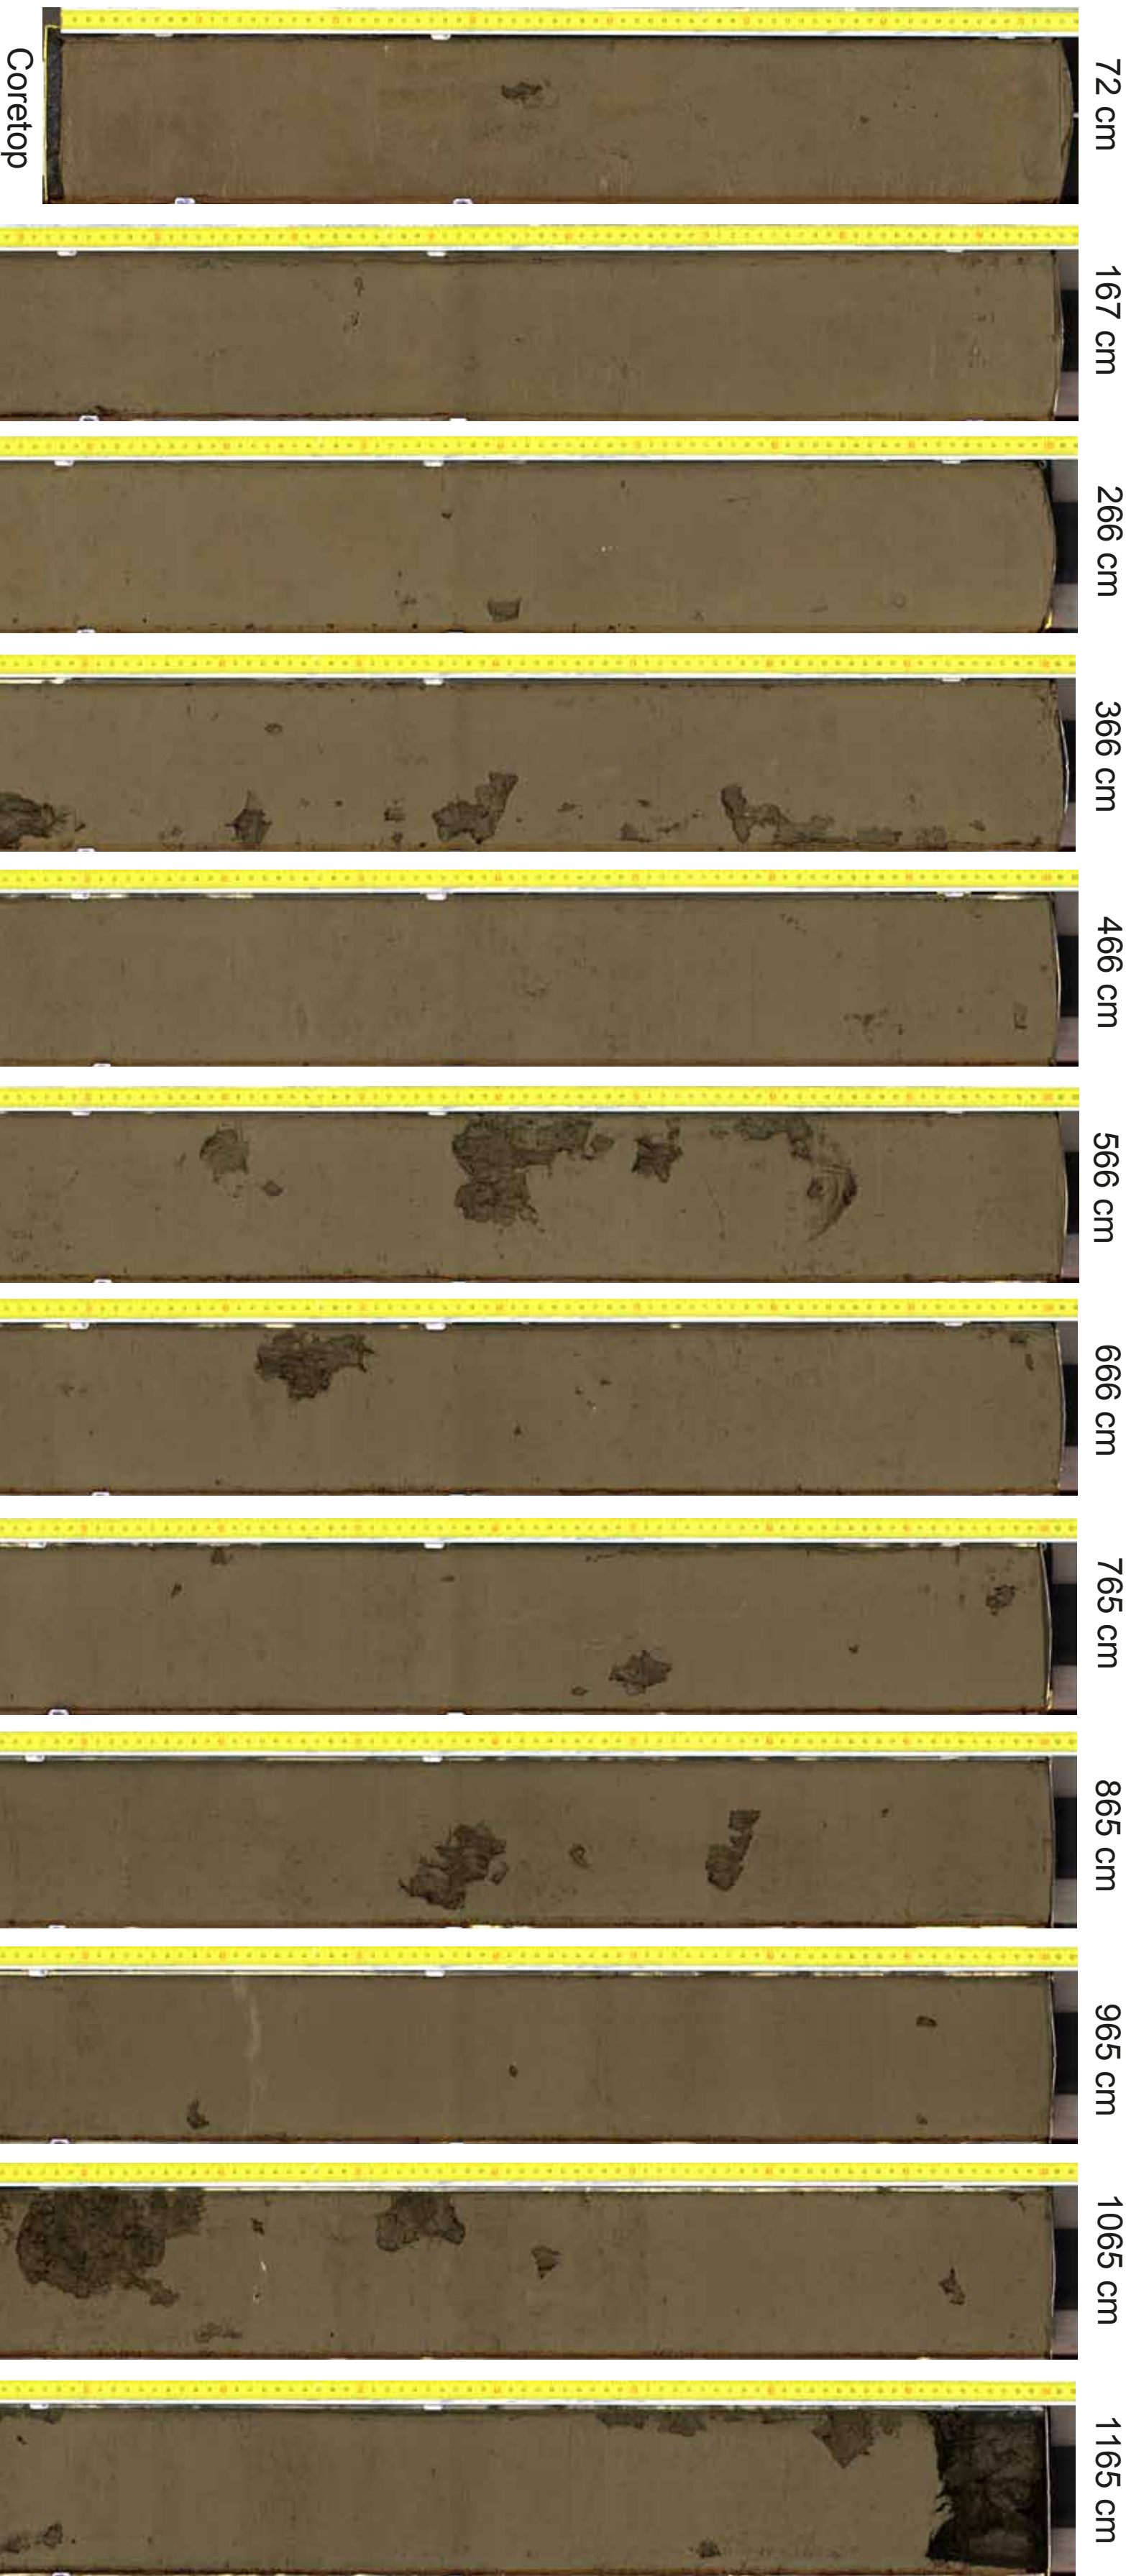

Supplement: Supplementary file 2 [file cp-16-1127-2020-supplement.zip]
